# Supplementary material
Source: PubMed Central journal article supplement (PMC4844227)
Supplement: NIHMS685669-supplement-01.pdf [file NIHMS685669-supplement-01.pdf]

**Supplemental Material for:**

Investigating Progression in Substance Use Initiation Using a Discrete-Time Multiple Event

Process Survival Mixture (MEPSUM) Approach

Leah S. Richmond-Rakerd<sup>1,2</sup>, Kimberly A. Fleming<sup>1,2</sup>, & Wendy S. Slutske<sup>1,2</sup>

<sup>1</sup> Department of Psychological Sciences, University of Missouri - Columbia

<sup>2</sup> Midwest Alcoholism Research Center

Corresponding author:

Leah S. Richmond-Rakerd  
Department of Psychological Sciences  
University of Missouri - Columbia  
210 McAlester Hall  
Columbia, MO 65211  
E-mail: LR526@mail.missouri.edu  
Phone: (573)-882-6860  
Fax: (573) 882-7710

*Table S1.* Results from Omnibus Tests of Interactions Between Demographics and Externalizing Psychopathology Predicting Class Membership

*Table S2.* Odds Ratios [and Confidence Intervals] of the Interactions Between Demographics and Externalizing Psychopathology Predicting Class Membership

*Table S3.* Correlations Between Predictor Variables

## PROGRESSION IN SUBSTANCE USE INITIATION

54

*Table S1.* Results from Omnibus Tests of Interactions Between Demographics and Externalizing Psychopathology Predicting Class Membership

| Sex X Psychopathology    |              |          |                  | Ethnicity X Psychopathology    |              |          |                 |
|--------------------------|--------------|----------|------------------|--------------------------------|--------------|----------|-----------------|
| Measure                  | $\chi^2$     | df       | <i>p</i> -value  | Measure                        | $\chi^2$     | df       | <i>p</i> -value |
| Sex                      | 232.36       | 3        | < .0001          | Ethnicity                      | 132.69       | 9        | < .0001         |
| AUD                      | 20.77        | 3        | < .001           | AUD                            | 371.18       | 3        | < .0001         |
| <b>Sex X AUD</b>         | <b>2.87</b>  | <b>3</b> | <b>.41</b>       | <b>Ethnicity X AUD</b>         | <b>15.77</b> | <b>9</b> | <b>.07</b>      |
| Sex                      | 191.65       | 3        | < .0001          | Ethnicity                      | 169.97       | 9        | < .0001         |
| CUD                      | 24.21        | 3        | < .0001          | CUD                            | 145.76       | 3        | < .0001         |
| <b>Sex X CUD</b>         | <b>2.11</b>  | <b>3</b> | <b>.54</b>       | <b>Ethnicity X CUD</b>         | <b>16.55</b> | <b>9</b> | <b>.06</b>      |
| Sex                      | 26.81        | 3        | < .0001          | Ethnicity                      | 178.28       | 9        | < .0001         |
| ND                       | 361.38       | 3        | < .0001          | ND                             | 449.50       | 3        | < .0001         |
| <b>Sex X ND</b>          | <b>5.95</b>  | <b>3</b> | <b>.11</b>       | <b>Ethnicity X ND</b>          | <b>10.81</b> | <b>9</b> | <b>.29</b>      |
| Sex                      | 16.84        | 3        | < .0001          | Ethnicity                      | 311.07       | 9        | < .0001         |
| Delinquency              | 409.99       | 3        | < .001           | Delinquency                    | 562.72       | 3        | < .0001         |
| <b>Sex X Delinquency</b> | <b>18.56</b> | <b>3</b> | <b>&lt; .001</b> | <b>Ethnicity X Delinquency</b> | <b>15.39</b> | <b>9</b> | <b>.08</b>      |

*Notes.* AUD = alcohol use disorder, CUD = cannabis use disorder, ND = nicotine dependence. Statistically significant interactions presented in bold text. Ethnicity was coded as a four-category variable, with Caucasian serving as the reference category.

*Table S2. Odds Ratios [and Confidence Intervals] of the Interactions Between Demographics and Externalizing Psychopathology Predicting Class Membership*

| Class     | Interaction Effect |                         |                   |                   |
|-----------|--------------------|-------------------------|-------------------|-------------------|
|           | Sex X AUD          | Ethnicity X AUD         |                   |                   |
|           |                    | Black                   | Hispanic          | Other             |
| HS vs. MS | 0.95 [0.80, 1.13]  | 1.12 [0.87, 1.45]       | 1.25 [0.95, 1.64] | 1.41 [1.07, 1.87] |
| EA vs. MS | 1.00 [0.85, 1.19]  | 0.76 [0.61, 0.95]       | 0.8 [0.61, 1.03]  | 0.88 [0.67, 1.16] |
| RA vs. MS | 0.73 [0.58, 0.92]  | 0.68 [0.52, 0.88]       | 1.08 [0.76, 1.54] | 0.37 [0.23, 0.58] |
| EA vs. HS | 1.06 [0.93, 1.21]  | 0.68 [0.56, 0.81]       | 0.64 [0.47, 0.86] | 0.62 [0.47, 0.83] |
| RA vs. HS | 0.77 [0.62, 0.97]  | 0.60 [0.44, 0.82]       | 0.86 [0.60, 1.24] | 0.26 [0.16, 0.42] |
|           | Sex X CUD          | Ethnicity X CUD         |                   |                   |
| HS vs. MS | 0.88 [0.73, 1.05]  | 0.84 [0.61, 1.16]       | 1.12 [0.85, 1.48] | 1.01 [0.64, 1.58] |
| EA vs. MS | 0.75 [0.60, 0.93]  | 1.22 [0.94, 1.57]       | 0.69 [0.50, 0.96] | 0.94 [0.58, 1.51] |
| RA vs. MS | 1.17 [0.77, 1.77]  | 4.19 [2.34, 7.47]       | 0.78 [0.27, 2.28] | 0.85 [0.29, 2.51] |
| EA vs. HS | 0.86 [0.70, 1.05]  | 1.45 [1.15, 1.83]       | 0.62 [0.43, 0.88] | 0.93 [0.52, 1.67] |
| RA vs. HS | 1.33 [0.88, 2.01]  | 5.00 [2.90, 8.61]       | 0.70 [0.24, 2.04] | 0.85 [0.28, 2.57] |
|           | Sex X ND           | Ethnicity X ND          |                   |                   |
| HS vs. MS | 0.82 [0.70, 0.97]  | 1.21 [0.97, 1.52]       | 0.98 [0.74, 1.29] | 0.80 [0.59, 1.09] |
| EA vs. MS | 0.68 [0.58, 0.80]  | 1.55 [1.06, 2.26]       | 1.40 [0.99, 1.97] | 0.65 [0.47, 0.90] |
| RA vs. MS | 0.83 [0.69, 1.00]  | 1.04 [0.73, 1.48]       | 0.65 [0.45, 0.93] | 0.40 [0.26, 0.61] |
| EA vs. HS | 0.83 [0.70, 0.99]  | 1.28 [0.98, 1.67]       | 1.43 [1.06, 1.93] | 0.81 [0.58, 1.13] |
| RA vs. HS | 1.01 [0.79, 1.29]  | 0.86 [0.67, 1.10]       | 0.66 [0.46, 0.95] | 0.49 [0.33, 0.73] |
|           | Sex X Delinquency  | Ethnicity X Delinquency |                   |                   |
| HS vs. MS | 0.90 [0.85, 0.95]  | 1.12 [1.04, 1.21]       | 1.05 [0.96, 1.15] | 1.11 [1.00, 1.22] |
| EA vs. MS | 0.73 [0.67, 0.80]  | 1.26 [1.14, 1.39]       | 1.24 [1.09, 1.41] | 1.29 [1.12, 1.48] |
| RA vs. MS | 0.65 [0.58, 0.72]  | 1.27 [1.11, 1.44]       | 1.15 [1.01, 1.32] | 1.38 [1.19, 1.60] |
| EA vs. HS | 0.82 [0.75, 0.89]  | 1.13 [1.02, 1.25]       | 1.19 [1.06, 1.32] | 1.17 [0.40, 3.40] |
| RA vs. HS | 0.72 [0.65, 0.79]  | 1.13 [1.00, 1.27]       | 1.10 [0.97, 1.25] | 1.25 [1.09, 1.43] |

*Notes.* HS = high school, MS = middle school, EA = early adulthood, RA = relative abstainer.

AUD = alcohol use disorder, CUD = cannabis use disorder, ND = nicotine dependence. Odds ratios for delinquency are calculated as a function of a one standard deviation change in delinquency. Ethnicity was coded as a four-category variable, with Caucasian serving as the reference category.

## PROGRESSION IN SUBSTANCE USE INITIATION

56

Table S3. Correlations Between Predictor Variables

| <b>Demographics</b>                  | <b>Externalizing Psychopathology</b> |       |       |             | <b>Personality</b> |               |                   |             |          |
|--------------------------------------|--------------------------------------|-------|-------|-------------|--------------------|---------------|-------------------|-------------|----------|
|                                      | AUD                                  | CUD   | ND    | Delinquency | Extraversion       | Agreeableness | Conscientiousness | Neuroticism | Openness |
| Female                               | -0.21                                | -0.25 | -0.11 | -0.14       | 0.04               | 0.22          | 0.09              | 0.20        | -0.11    |
| White                                | 0.18                                 | 0.04  | 0.16  | -0.04       | 0.04               | 0.03          | -0.04             | -0.04       | 0.02     |
| Black                                | -0.14                                | -0.01 | -0.09 | -0.02       | -0.06              | -0.01         | 0.05              | 0.03        | 0.01     |
| Hispanic                             | -0.07                                | -0.03 | -0.09 | 0.05        | 0.02               | -0.02         | 0.01              | 0.03        | -0.04    |
| Other                                | -0.02                                | -0.02 | -0.03 | 0.02        | -0.02              | 0.00          | 0.00              | 0.01        | 0.00     |
| <b>Externalizing Psychopathology</b> |                                      |       |       |             |                    |               |                   |             |          |
| AUD                                  | 1.00                                 |       |       |             | 0.10               | -0.03         | -0.07             | 0.01        | 0.10     |
| CUD                                  | 0.52                                 | 1.00  |       |             | 0.03               | -0.03         | -0.06             | 0.05        | 0.08     |
| ND                                   | 0.27                                 | 0.37  | 1.00  |             | 0.01               | -0.06         | -0.09             | 0.10        | -0.02    |
| Delinquency                          | 0.17                                 | 0.21  | 0.14  | 1.00        | 0.06               | -0.09         | -0.06             | 0.08        | 0.02     |
| <b>Personality</b>                   |                                      |       |       |             |                    |               |                   |             |          |
| Extraversion                         | 0.10                                 | 0.03  | 0.01  | 0.06        | 1.00               |               |                   |             |          |
| Agreeableness                        | -0.03                                | -0.03 | -0.06 | -0.09       | 0.25               | 1.00          |                   |             |          |
| Conscientiousness                    | -0.07                                | -0.06 | -0.09 | -0.06       | 0.09               | 0.44          | 1.00              |             |          |
| Neuroticism                          | 0.01                                 | 0.05  | 0.10  | 0.08        | -0.11              | -0.08         | -0.11             | 1.00        |          |
| Openness                             | 0.10                                 | 0.08  | -0.02 | 0.02        | 0.22               | 0.20          | 0.05              | -0.14       | 1.00     |

Notes. AUD = alcohol use disorder, CUD = cannabis use disorder, ND = nicotine dependence. Correlations between continuous variables (personality and delinquency) are Pearson coefficients. Correlations between dichotomous variables (demographics, AUD, CUD, and ND) are tetrachoric coefficients. Correlations between continuous and dichotomous variables are point biserial coefficients.
